# Supplementary material
Source: PubMed Central journal article supplement (PMC3338008)

Supplementary Figure 1, Ahnesorg and Jackson 2006

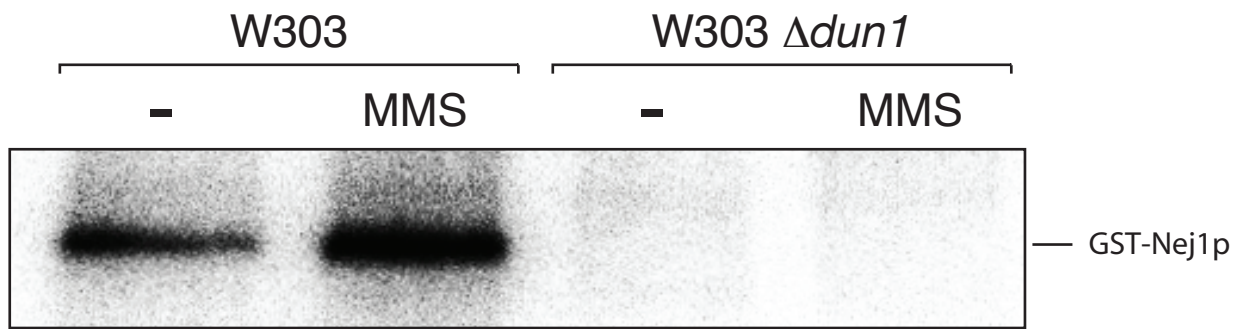

Supplement: NIHMS47860-supplement-Fig_1.pdf [file NIHMS47860-supplement-Fig_1.pdf]
